# Supplementary material for: Structural Domains of the <em>Bacillus thuringiensis</em> Vip3Af Protein Unraveled by Tryptic Digestion of Alanine Mutants
Source: Preprints.org preprint supplement (doi:10.20944/preprints201905.0203.v1), 2019-05-16
Supplement: Supplementary file 1 [file supplementary]

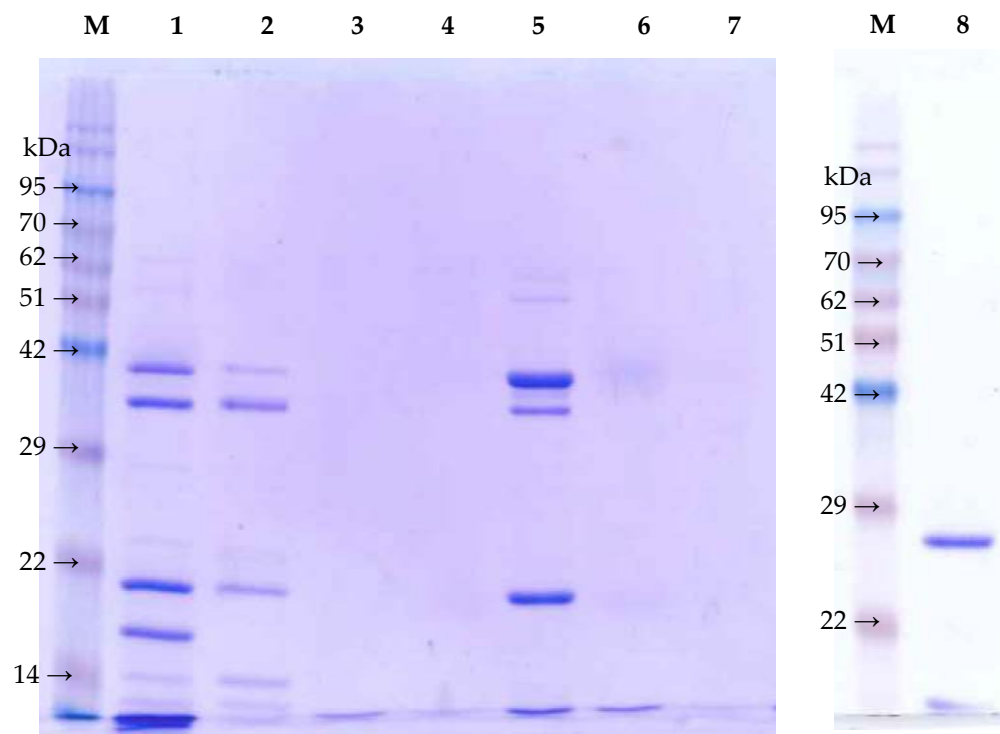

Figure S2. SDS-PAGE analysis of chromatographic peaks of trypsin-treated W552A and F229A mutants after gel filtration chromatography in Superdex 200. (1), W552A, input; (2), W552A, A11, 24-26 min; (3), W552A, B13, 38-40 min; (4), W552A, B12, 40-42 min; (5), W552A, A11, 24-26 min; (6), W552A, B13, 38-40 min; (7), W552A, B12, 40-42 min; (8), F229A, B15, 34-36 min.
