# Supplementary material for: Structural Domains of the <em>Bacillus thuringiensis</em> Vip3Af Protein Unraveled by Tryptic Digestion of Alanine Mutants
Source: Preprints.org preprint supplement (doi:10.20944/preprints201905.0203.v1), 2019-05-16
Supplement: Supplementary file 2 [file supplementary]

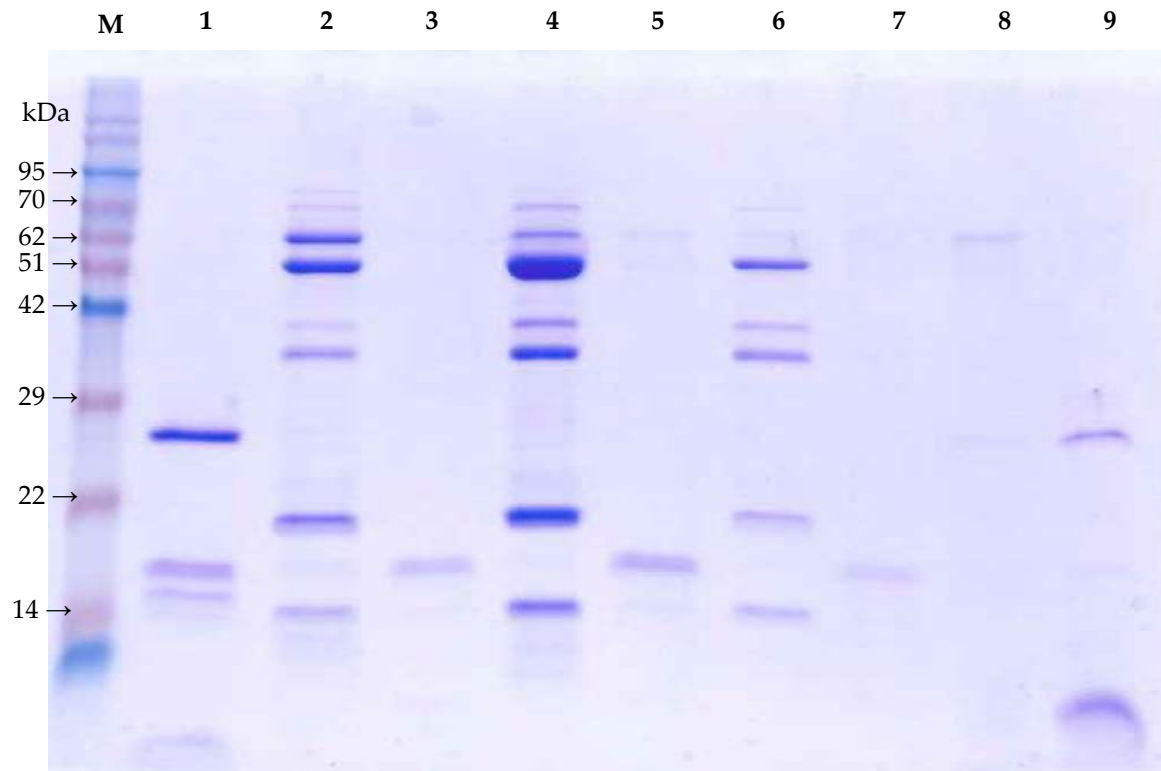

**Figure S1.** SDS-PAGE analysis of chromatographic peaks of trypsin-treated Vip3Af Ala-mutants after gel filtration chromatography in Superdex 200. (1), P171A, B15, 34-36 min; (2), G689A, A11, 24-26 min; (3), G689A, B15, 34-36 min; (4), I699A, A11, 24-26 min; (5), I699A, B15, 34-36 min; (6), Y719A, A11, 24-26 min; (7), Y719A, B15, 34-36 min; (8), E483A, B14, 32-34 min; (9), E483A, B15, 34-36 min.
